# Supplementary material for: Development of time-varying global gridded T s – T m model for precise GPS–PWV retrieval
Source: Copernicus journal article supplement (doi:10.5194/amt-12-1233-2019), 2019-02-27
Supplement: Supplementary file [file amt-12-1233-2019-supplement-title-page.pdf › amt-12-1233-2019-supplement-title-page.pdf]

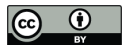

## *Supplement of*

# **Development of time-varying global gridded $T_s$ – $T_m$ model for precise GPS–PWV retrieval**

**Peng Jiang et al.**

*Correspondence to:* Peng Jiang (jiangpeng@ahu.edu.cn)

- amt-12-1233-2019-supplement-title-page.pdf
- supplements
  - Coeff\_TVGG\_ERAI.mat
  - Generate\_Ts\_Tm\_coeffs.m
  - sample\_main.m

The copyright of individual parts of the supplement might differ from the CC BY 4.0 License.
